# Supplementary figures and images for: Natural History of DNA-Dependent DNA Polymerases: Multiple Pathways to the Origins of DNA
Source: MDPI journal article supplement (doi:10.3390/v15030749), 2023-03-14

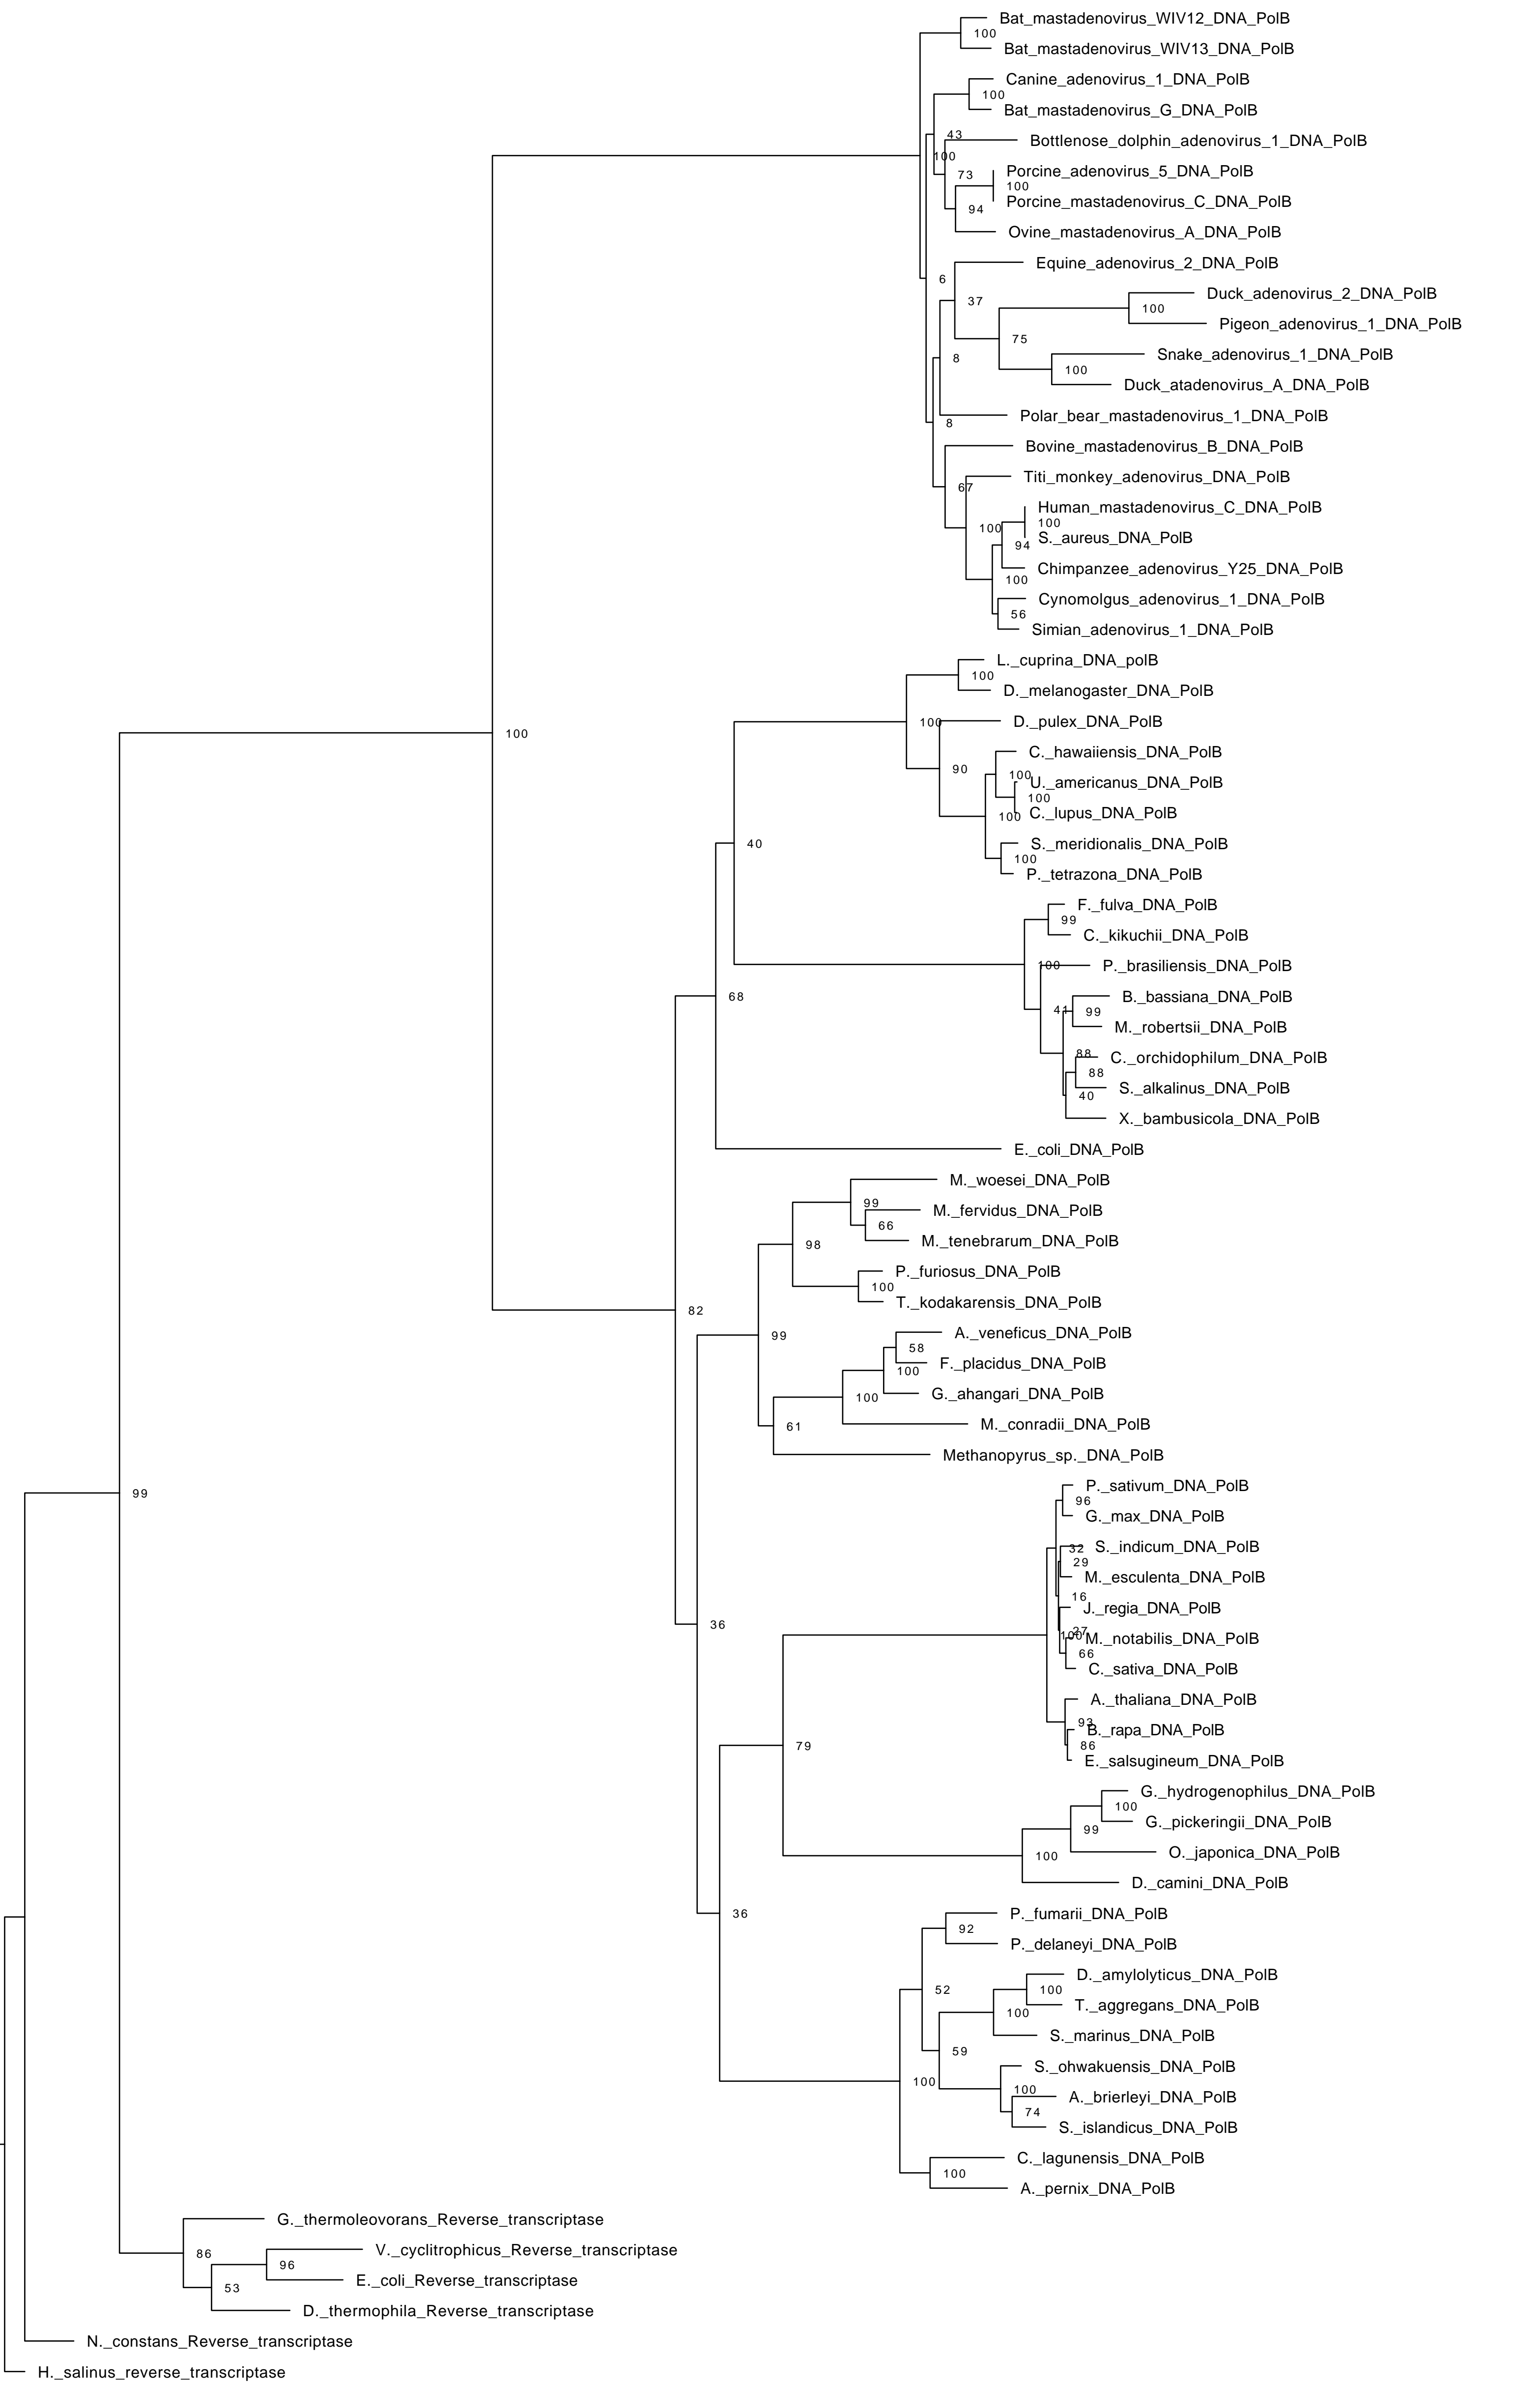

Supplement: s1 [file s1]

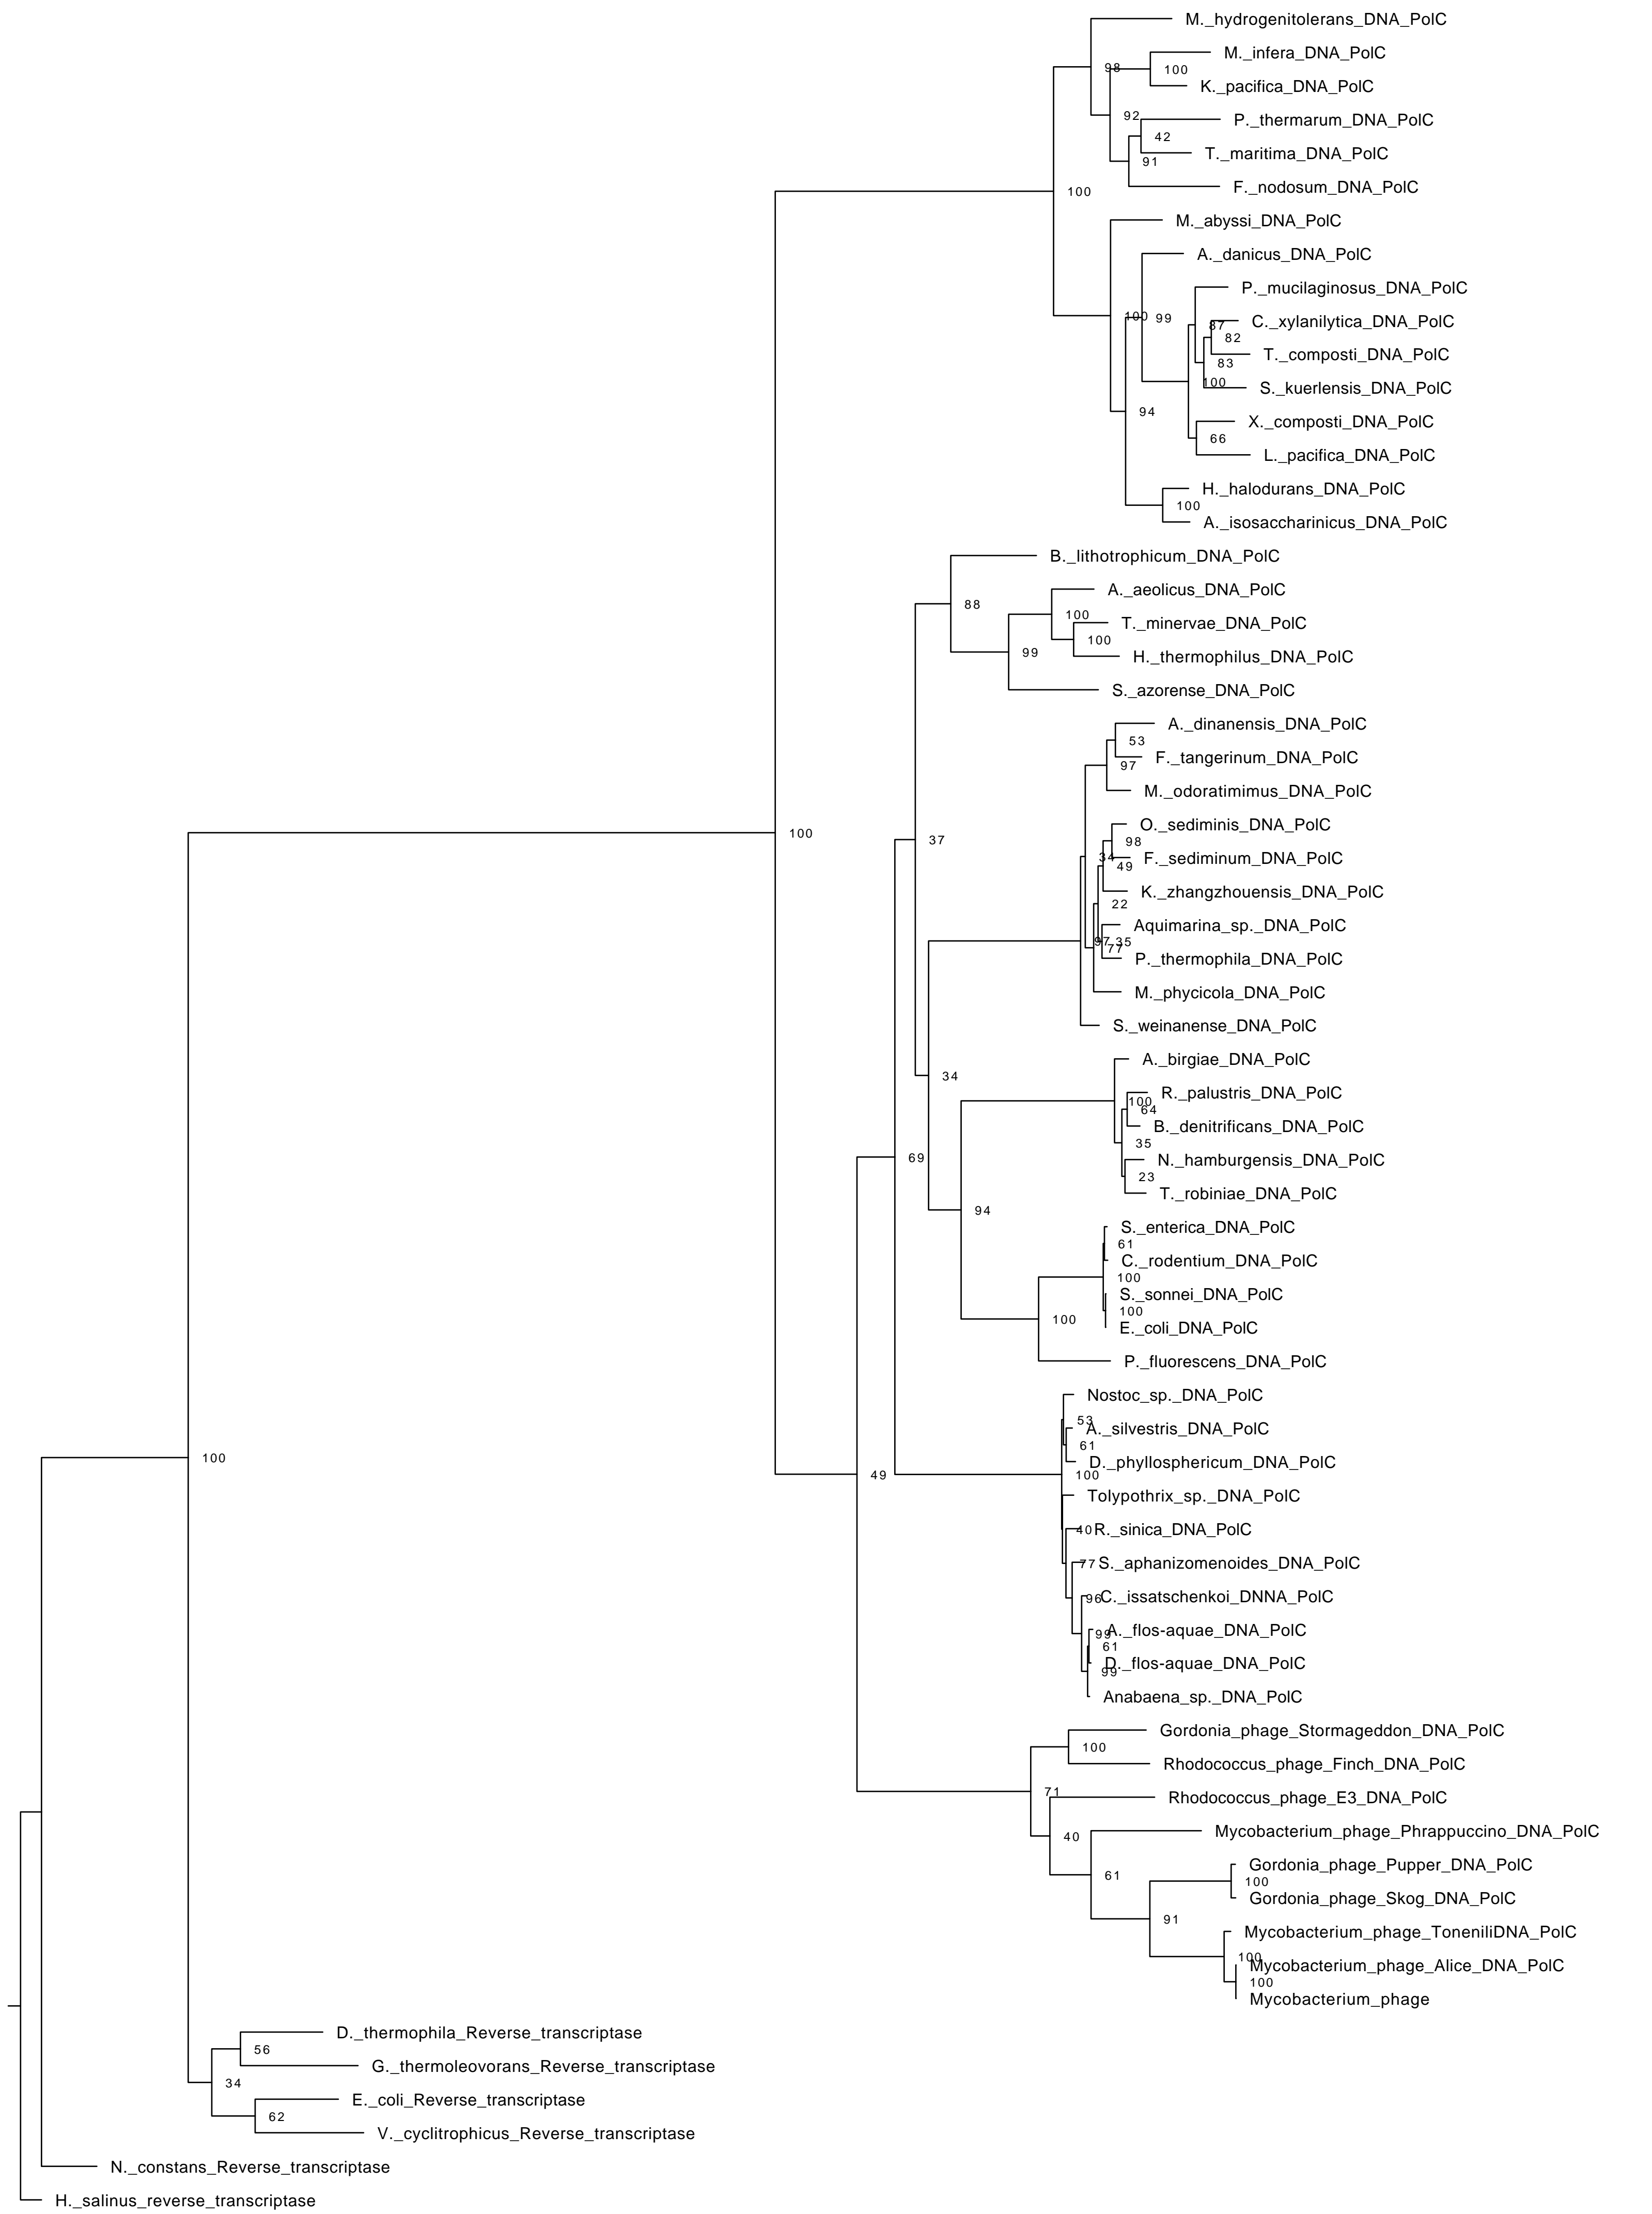

0.8

Supplement: s1 [file s1]

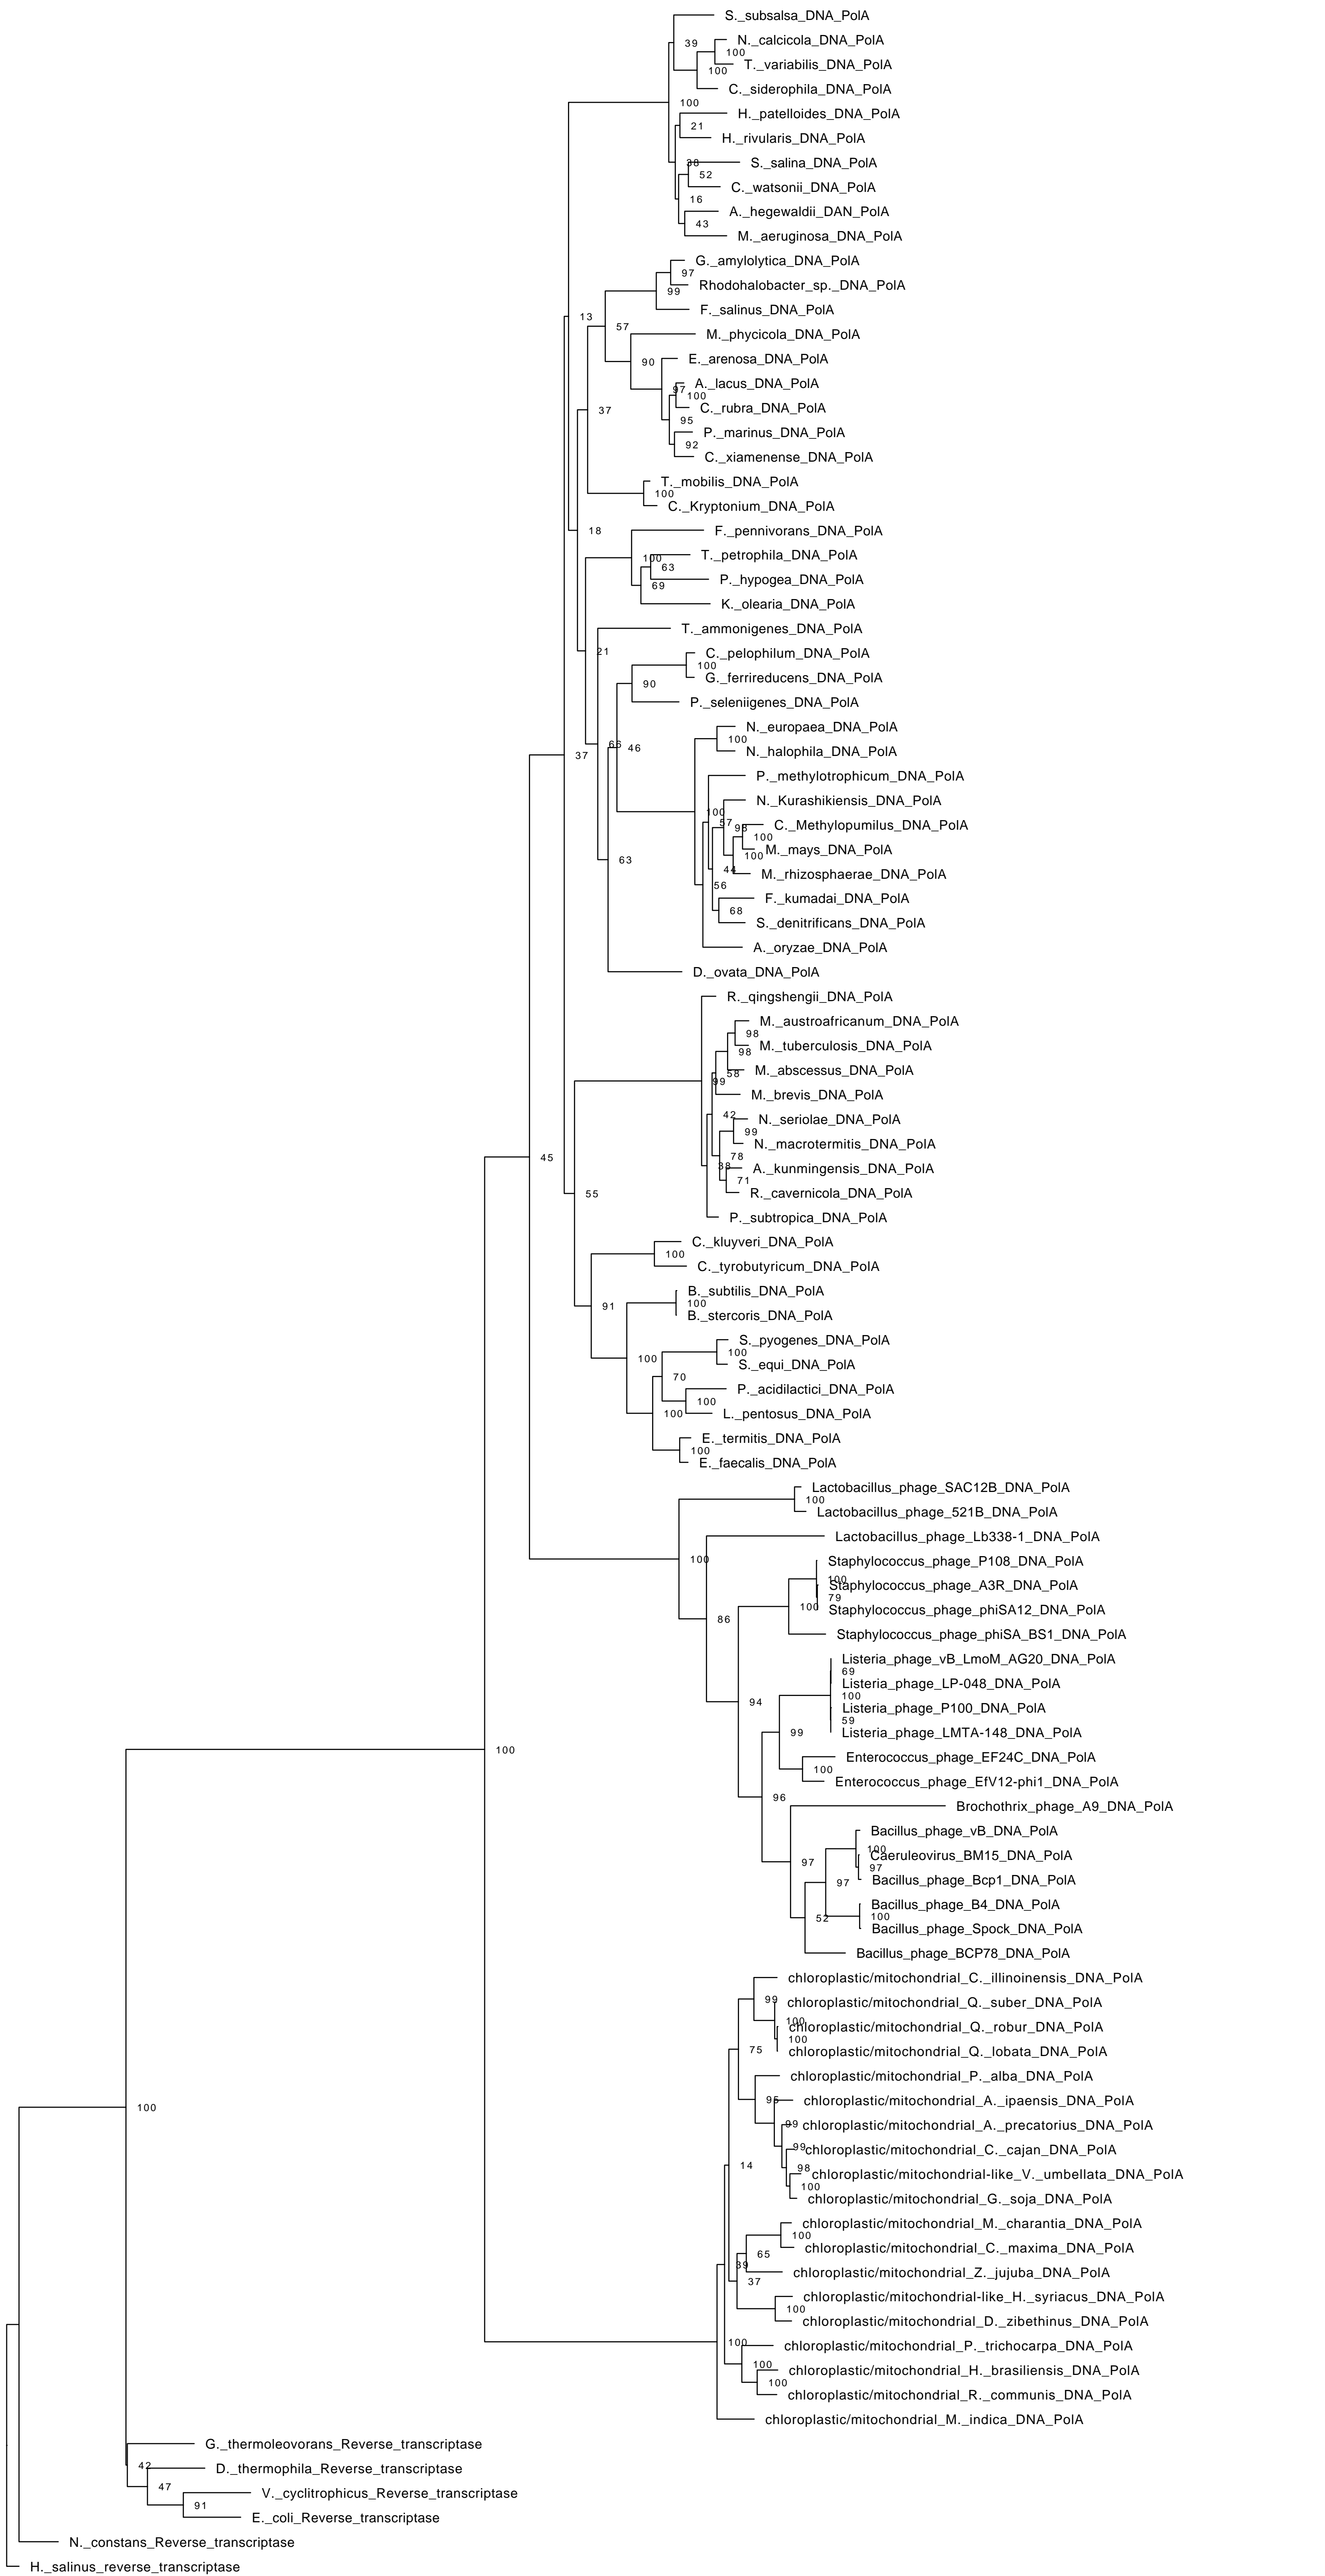

Supplement: s1 [file s1]
